# Supplementary material
Source: PubMed Central journal article supplement (PMC3280053)
Supplement: supp_WNL.0b013e31824365e4_table_e-1.pdf [file supp_WNL.0b013e31824365e4_table_e-1.pdf]

| <b>Probe</b> | <b>Chromosomal Position</b> |
|--------------|-----------------------------|
| Hs02865346   | chrX:153,211,368            |
| Hs04119488   | chrX:153,158,831            |
| Hs04106442   | chrX:153,067,513            |
| Hs02978322   | chrX:153,252,548            |
| Hs04110316   | chrX:153,027,169            |
| Hs04112562   | chrX:152,983,865            |
| Hs00548551   | chrX:152,943,207            |
| Hs02337706   | chrX:153,559,517            |
| Hs01377829   | chrX:153,262,766            |
| Hs04104243   | chrX:153,217,261            |
| Hs01774442   | chrX:153,246,435            |
| Hs02817365   | chrX:153,282,562            |
| Hs02153464   | chrX:153,230,535            |
| Hs04507139   | chrX:153,299,504            |
| Hs01590521,  | chrX:153,240,596,           |
| Hs00673982   | chrX:153,241,067            |
| Hs00210052   | chrX:153,240,808            |

**Supplemental Table 1: QPCR Copy Number Probes**
